# Supplementary material
Source: PubMed Central journal article supplement (PMC4209315)

**Figure S1.** . Per member per month net Medicare Part D payment for selected chronic kidney disease mineral and bone disorder medications in Medicare Part D enrolled dialysis patients, 2007-2010

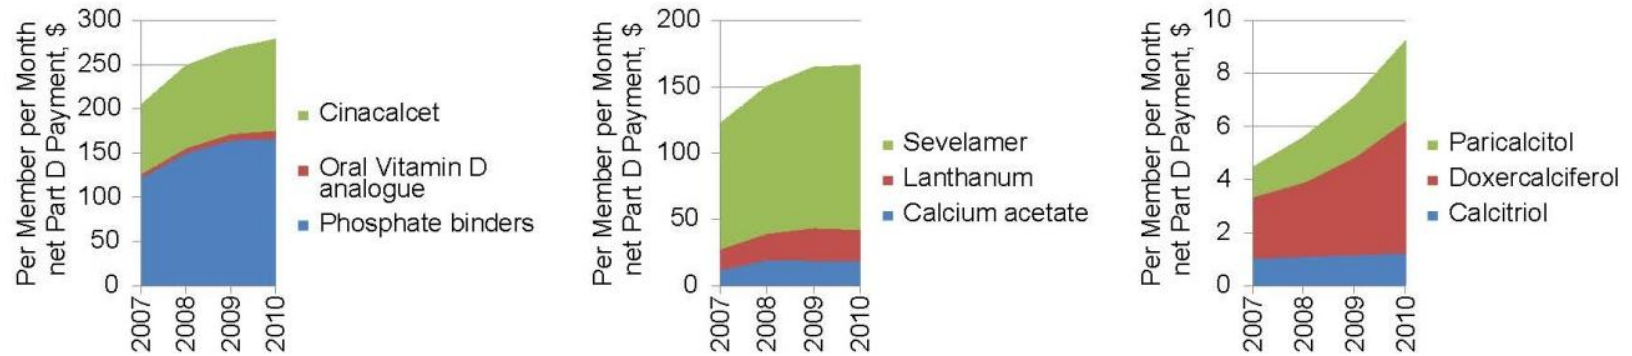

Supplement: NIHMS598882-supplement-01.pdf [file NIHMS598882-supplement-01.pdf]
