# Supplementary material
Source: PubMed Central journal article supplement (PMC4209315)

**Figure S2.** Per user per month out-of-pocket costs for chronic kidney disease mineral bone disorder medications in Medicare Part D-enrolled dialysis patients without low-income subsidy

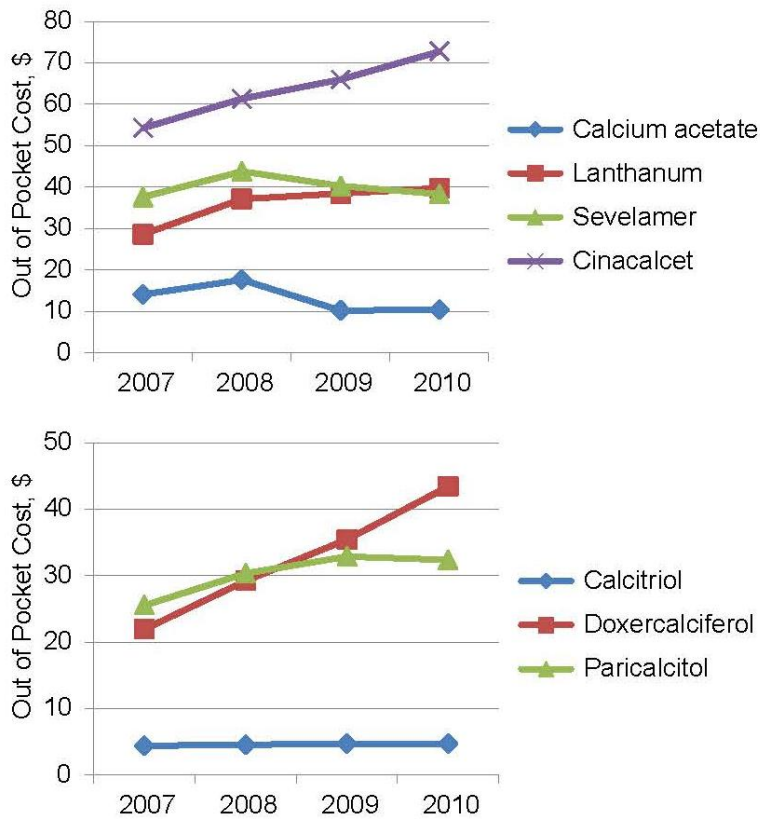

Supplement: NIHMS598882-supplement-02.pdf [file NIHMS598882-supplement-02.pdf]
