# Supplementary material
Source: PubMed Central journal article supplement (PMC4209315)
Supplement: NIHMS598882-supplement-03.pdf [file NIHMS598882-supplement-03.pdf]

**Table S1.** Odds of chronic kidney disease mineral and bone disorder medication prescription in Medicare Part D-enrolled dialysis patients by dialysis organizations, 2010 (reference group: DaVita)<sup>a</sup>

| Medications             | Fresenius |          | Dialysis Clinics, Inc. |          | Small Dialysis Organization |          | Independent |          | Hospital-Based |          |
|-------------------------|-----------|----------|------------------------|----------|-----------------------------|----------|-------------|----------|----------------|----------|
|                         | OR        | P        | OR                     | P        | OR                          | P        | OR          | P        | OR             | P        |
| Phosphate binder        | 0.81      | < 0.0001 | 0.87                   | < 0.0001 | 0.83                        | < 0.0001 | 0.81        | < 0.0001 | 0.68           | < 0.0001 |
| Calcium acetate         | 1.45      | < 0.0001 | 1.67                   | < 0.0001 | 1.30                        | < 0.0001 | 1.21        | < 0.0001 | 1.23           | < 0.0001 |
| Lanthanum carbonate     | 0.59      | < 0.0001 | 0.63                   | < 0.0001 | 0.72                        | < 0.0001 | 0.66        | < 0.0001 | 0.61           | < 0.0001 |
| Sevelamer               | 0.68      | < 0.0001 | 0.68                   | < 0.0001 | 0.75                        | < 0.0001 | 0.81        | < 0.0001 | 0.70           | < 0.0001 |
| Oral Vitamin D analogue | 0.77      | < 0.0001 | 0.88                   | 0.004    | 0.91                        | 0.0002   | 1.23        | < 0.0001 | 0.98           | 0.50     |
| Calcitriol              | 0.91      | 0.0002   | 1.04                   | 0.50     | 0.97                        | 0.40     | 1.42        | < 0.0001 | 1.28           | < 0.0001 |
| Doxercalciferol         | 0.53      | < 0.0001 | 0.70                   | < 0.0001 | 0.75                        | < 0.0001 | 1.05        | 0.30     | 0.63           | < 0.0001 |
| Paricalcitol            | 0.65      | < 0.0001 | 0.65                   | < 0.0001 | 0.88                        | 0.01     | 0.98        | 0.70     | 0.60           | < 0.0001 |
| IV Vitamin D analogue   | 1.11      | < 0.0001 | 0.96                   | 0.09     | 0.92                        | < 0.0001 | 0.98        | 0.10     | 0.56           | < 0.0001 |
| Calcitriol              | 0.80      | < 0.0001 | 1.75                   | < 0.0001 | 0.97                        | 0.60     | 2.26        | < 0.0001 | 2.53           | < 0.0001 |
| Doxercalciferol         | 0.26      | < 0.0001 | 1.21                   | < 0.0001 | 0.28                        | < 0.0001 | 0.39        | < 0.0001 | 0.35           | < 0.0001 |
| Paricalcitol            | 1.25      | < 0.0001 | 0.82                   | < 0.0001 | 0.96                        | 0.01     | 0.59        | < 0.0001 | 0.35           | < 0.0001 |
| Calcimimetic            |           |          |                        |          |                             |          |             |          |                |          |
| Cinacalcet              | 0.68      | < 0.0001 | 0.64                   | < 0.0001 | 0.68                        | < 0.0001 | 0.79        | < 0.0001 | 0.66           | < 0.0001 |

OR, odds ratio.

<sup>a</sup> ORs are calculated from a model including age, sex, race, and dialysis duration.
