# Supplementary material
Source: PubMed Central journal article supplement (PMC4209315)
Supplement: NIHMS598882-supplement-04.pdf [file NIHMS598882-supplement-04.pdf]

**Table S2.** Per member per month net Medicare Part D payment for chronic kidney disease mineral and bone disorder medications by low-income subsidy status

| Medication              | Without LIS        |                      | With LIS           |                      | All                |                      |
|-------------------------|--------------------|----------------------|--------------------|----------------------|--------------------|----------------------|
|                         | Total <sup>a</sup> | Percent <sup>b</sup> | Total <sup>a</sup> | Percent <sup>b</sup> | Total <sup>a</sup> | Percent <sup>b</sup> |
| 2007                    |                    |                      |                    |                      |                    |                      |
| All Part D medications  | 183.16             | 100.0                | 554.22             | 100.0                | 454.45             | 100.0                |
| All CKD-MBD medications | 73.47              | 40.11                | 252.31             | 45.52                | 204.22             | 44.94                |
| Phosphate binders       | 48.47              | 26.46                | 149.19             | 26.92                | 122.11             | 26.87                |
| Calcium acetate         | 6.21               | 3.39                 | 13.73              | 2.48                 | 11.71              | 2.58                 |
| Lanthanum carbonate     | 6.59               | 3.60                 | 19.05              | 3.44                 | 15.70              | 3.45                 |
| Sevelamer carbonate     | -                  | -                    | -                  | -                    | -                  | -                    |
| Sevelamer hydrochloride | 35.66              | 19.47                | 116.42             | 21.01                | 94.70              | 20.84                |
| Sevelamer               | 35.66              | 19.47                | 116.42             | 21.01                | 94.70              | 20.84                |
| Oral Vitamin D analogue | 2.17               | 1.18                 | 5.29               | 0.95                 | 4.45               | 0.98                 |
| Calcitriol              | 0.59               | 0.32                 | 1.17               | 0.21                 | 1.02               | 0.22                 |
| Doxercalciferol         | 1.04               | 0.57                 | 2.80               | 0.51                 | 2.32               | 0.51                 |
| Paricalcitol            | 0.55               | 0.30                 | 1.31               | 0.24                 | 1.11               | 0.24                 |
| Calcimimetic            |                    |                      |                    |                      |                    |                      |
| Cinacalcet              | 22.83              | 12.46                | 97.83              | 17.65                | 77.66              | 17.09                |
| 2008                    |                    |                      |                    |                      |                    |                      |
| All Part D medications  | 196.78             | 100.0                | 623.38             | 100.0                | 505.27             | 100.0                |
| All CKD-MBD medications | 87.16              | 44.29                | 310.39             | 49.79                | 248.58             | 49.20                |
| Phosphate binders       | 56.74              | 28.83                | 185.78             | 29.80                | 150.05             | 29.70                |
| Calcium acetate         | 10.33              | 5.25                 | 22.73              | 3.65                 | 19.30              | 3.82                 |
| Lanthanum carbonate     | 7.18               | 3.65                 | 24.88              | 3.99                 | 19.98              | 3.95                 |
| Sevelamer carbonate     | 2.07               | 1.05                 | 6.54               | 1.05                 | 5.30               | 1.05                 |
| Sevelamer hydrochloride | 37.17              | 18.89                | 131.63             | 21.12                | 105.47             | 20.87                |
| Sevelamer               | 39.24              | 19.94                | 138.16             | 22.16                | 110.77             | 21.92                |
| Oral Vitamin D analogue | 2.59               | 1.32                 | 6.74               | 1.08                 | 5.59               | 1.11                 |
| Calcitriol              | 0.64               | 0.33                 | 1.26               | 0.20                 | 1.09               | 0.22                 |
| Doxercalciferol         | 1.20               | 0.61                 | 3.42               | 0.55                 | 2.80               | 0.55                 |
| Paricalcitol            | 0.75               | 0.38                 | 2.06               | 0.33                 | 1.70               | 0.34                 |
| Calcimimetic            |                    |                      |                    |                      |                    |                      |
| Cinacalcet              | 27.83              | 14.14                | 117.87             | 18.91                | 92.94              | 18.39                |
| 2009                    |                    |                      |                    |                      |                    |                      |
| All Part D medications  | 202.02             | 100.0                | 667.67             | 100.0                | 536.13             | 100.0                |
| All CKD-MBD medications | 89.47              | 44.29                | 338.61             | 50.72                | 268.24             | 50.03                |
| Phosphate binders       | 57.68              | 28.55                | 206.77             | 30.97                | 164.66             | 30.71                |
| Calcium acetate         | 10.43              | 5.16                 | 22.13              | 3.31                 | 18.82              | 3.51                 |
| Lanthanum carbonate     | 7.67               | 3.80                 | 31.37              | 4.70                 | 24.67              | 4.60                 |
| Sevelamer carbonate     | 13.93              | 6.90                 | 41.89              | 6.27                 | 33.99              | 6.34                 |
| Sevelamer hydrochloride | 25.65              | 12.70                | 111.39             | 16.68                | 87.17              | 16.26                |
| Sevelamer               | 39.58              | 19.59                | 153.28             | 22.96                | 121.16             | 22.60                |
| Oral Vitamin D analogue | 3.02               | 1.49                 | 8.70               | 1.30                 | 7.10               | 1.32                 |
| Calcitriol              | 0.64               | 0.32                 | 1.35               | 0.20                 | 1.15               | 0.21                 |
| Doxercalciferol         | 1.41               | 0.70                 | 4.59               | 0.69                 | 3.69               | 0.69                 |
| Paricalcitol            | 0.97               | 0.48                 | 2.76               | 0.41                 | 2.25               | 0.42                 |

|                         |        |       |        |       |        |       |
|-------------------------|--------|-------|--------|-------|--------|-------|
| Calcimimetic            |        |       |        |       |        |       |
| Cinacalcet              | 28.77  | 14.24 | 123.14 | 18.44 | 96.48  | 18.00 |
| 2010                    |        |       |        |       |        |       |
| All Part D medications  | 207.22 | 100.0 | 691.15 | 100.0 | 555.22 | 100.0 |
| All CKD-MBD medications | 91.11  | 43.97 | 351.90 | 50.92 | 278.65 | 50.19 |
| Phosphate binders       | 56.22  | 27.13 | 209.30 | 30.28 | 166.30 | 29.95 |
| Calcium acetate         | 9.88   | 4.77  | 21.51  | 3.11  | 18.25  | 3.29  |
| Lanthanum carbonate     | 6.67   | 3.22  | 30.66  | 4.44  | 23.92  | 4.31  |
| Sevelamer carbonate     | 30.43  | 14.68 | 110.15 | 15.94 | 87.75  | 15.80 |
| Sevelamer hydrochloride | 9.24   | 4.46  | 46.98  | 6.80  | 36.38  | 6.55  |
| Sevelamer               | 39.67  | 19.14 | 157.12 | 22.73 | 124.13 | 22.36 |
| Oral Vitamin D analogue | 3.78   | 1.82  | 11.36  | 1.64  | 9.23   | 1.66  |
| Calcitriol              | 0.64   | 0.31  | 1.45   | 0.21  | 1.22   | 0.22  |
| Doxercalciferol         | 1.82   | 0.88  | 6.23   | 0.90  | 4.99   | 0.90  |
| Paricalcitol            | 1.32   | 0.64  | 3.68   | 0.53  | 3.01   | 0.54  |
| Calcimimetic            |        |       |        |       |        |       |
| Cinacalcet              | 31.11  | 15.01 | 131.24 | 18.99 | 103.12 | 18.57 |

CKD, chronic kidney disease; LIS, low-income subsidy; MBD, mineral and bone disorder.

<sup>a</sup> Total Part D net payment, \$.

<sup>b</sup> Percent of all Part D net payment.
