# Supplementary material
Source: PubMed Central journal article supplement (PMC4209315)
Supplement: NIHMS598882-supplement-05.pdf [file NIHMS598882-supplement-05.pdf]

**Table S3.** Per member per month net Part D payment for chronic kidney disease mineral and bone disorder medications by dialysis organization type

| Medications             | Per Member per Month Net Part D Payment (\$) |        |                        |                              |             |                |
|-------------------------|----------------------------------------------|--------|------------------------|------------------------------|-------------|----------------|
|                         | Fresenius                                    | DaVita | Dialysis Clinics, Inc. | Small Dialysis Organizations | Independent | Hospital-Based |
| 2007                    |                                              |        |                        |                              |             |                |
| Phosphate binder        | 108.13                                       | 155.99 | 104.95                 | 117.40                       | 114.71      | 101.05         |
| Calcium acetate         | 12.94                                        | 10.23  | 13.67                  | 11.28                        | 11.80       | 11.09          |
| Lanthanum               | 14.03                                        | 21.94  | 14.68                  | 15.68                        | 13.38       | 10.81          |
| Sevelamer               | 81.16                                        | 123.83 | 76.60                  | 90.44                        | 89.53       | 79.15          |
| Oral vitamin D analogue | 3.24                                         | 5.69   | 3.47                   | 4.27                         | 4.58        | 4.07           |
| Calcitriol              | 0.85                                         | 0.99   | 1.01                   | 0.96                         | 1.14        | 1.20           |
| Doxercalciferol         | 1.61                                         | 3.08   | 1.94                   | 2.11                         | 2.33        | 2.04           |
| Paricalcitol            | 0.78                                         | 1.62   | 0.52                   | 1.21                         | 1.10        | 0.83           |
| Calcimemetic            |                                              |        |                        |                              |             |                |
| Cinacalcet              | 72.12                                        | 106.21 | 59.08                  | 70.81                        | 66.01       | 59.18          |
| 2008                    |                                              |        |                        |                              |             |                |
| Phosphate binder        | 132.05                                       | 196.27 | 132.33                 | 140.51                       | 137.86      | 123.25         |
| Calcium acetate         | 21.57                                        | 16.36  | 24.48                  | 18.64                        | 19.63       | 18.41          |
| Lanthanum               | 15.92                                        | 29.45  | 19.38                  | 18.58                        | 16.47       | 15.64          |
| Sevelamer               | 94.56                                        | 150.46 | 88.47                  | 103.29                       | 101.76      | 89.20          |
| Oral vitamin D analogue | 4.41                                         | 7.17   | 5.09                   | 5.35                         | 6.06        | 4.81           |
| Calcitriol              | 0.98                                         | 1.03   | 1.10                   | 1.01                         | 1.25        | 1.34           |
| Doxercalciferol         | 2.20                                         | 3.54   | 2.92                   | 2.47                         | 3.35        | 2.12           |
| Paricalcitol            | 1.22                                         | 2.60   | 1.07                   | 1.86                         | 1.47        | 1.34           |
| Calcimemetic            |                                              |        |                        |                              |             |                |
| Cinacalcet              | 82.93                                        | 130.50 | 70.82                  | 77.75                        | 79.56       | 70.80          |
| 2009                    |                                              |        |                        |                              |             |                |
| Phosphate binder        | 143.68                                       | 216.62 | 146.37                 | 151.08                       | 151.88      | 135.21         |
| Calcium acetate         | 20.85                                        | 16.93  | 22.68                  | 17.49                        | 18.85       | 17.75          |
| Lanthanum               | 19.03                                        | 36.53  | 22.79                  | 22.69                        | 20.70       | 20.17          |
| Sevelamer               | 103.80                                       | 163.16 | 100.90                 | 110.89                       | 112.33      | 97.29          |
| Oral vitamin D analogue | 5.13                                         | 9.44   | 6.30                   | 6.23                         | 8.76        | 5.64           |
| Calcitriol              | 1.01                                         | 1.17   | 1.30                   | 1.01                         | 1.29        | 1.37           |
| Doxercalciferol         | 2.59                                         | 4.89   | 3.32                   | 2.99                         | 5.16        | 2.57           |
| Paricalcitol            | 1.53                                         | 3.39   | 1.68                   | 2.22                         | 2.32        | 1.71           |
| Calcimemetic            |                                              |        |                        |                              |             |                |
| Cinacalcet              | 85.15                                        | 131.23 | 81.49                  | 79.60                        | 86.69       | 77.25          |
| 2010                    |                                              |        |                        |                              |             |                |
| Phosphate binder        | 142.90                                       | 221.81 | 149.09                 | 146.28                       | 155.90      | 134.53         |
| Calcium acetate         | 19.70                                        | 17.72  | 21.09                  | 17.63                        | 17.19       | 16.73          |
| Lanthanum               | 17.53                                        | 37.52  | 20.98                  | 20.54                        | 20.10       | 17.52          |
| Sevelamer               | 105.68                                       | 166.58 | 107.02                 | 108.11                       | 118.61      | 100.29         |
| Oral vitamin D analogue | 5.84                                         | 12.98  | 7.34                   | 8.27                         | 12.62       | 6.82           |
| Calcitriol              | 1.04                                         | 1.28   | 1.18                   | 1.01                         | 1.56        | 1.40           |
| Doxercalciferol         | 2.82                                         | 7.29   | 4.24                   | 4.27                         | 7.44        | 3.31           |
| Paricalcitol            | 1.97                                         | 4.41   | 1.93                   | 2.98                         | 3.61        | 2.11           |

|              |       |        |       |       |        |       |
|--------------|-------|--------|-------|-------|--------|-------|
| Calcimemetic |       |        |       |       |        |       |
| Cinacalcet   | 91.69 | 134.94 | 85.53 | 82.64 | 101.47 | 85.28 |

---

IV, intravenous.
