# Supplementary material
Source: PubMed Central journal article supplement (PMC4209315)
Supplement: NIHMS598882-supplement-06.pdf [file NIHMS598882-supplement-06.pdf]

**Table S4.** Percentage of patients prescribed chronic kidney disease mineral and bone disorder medications by dialysis organization type

|                         | Dialysis Organization |           |        |                        |                              |             |                |
|-------------------------|-----------------------|-----------|--------|------------------------|------------------------------|-------------|----------------|
|                         | All                   | Fresenius | DaVita | Dialysis Clinics, Inc. | Small Dialysis Organizations | Independent | Hospital-Based |
| 2007                    |                       |           |        |                        |                              |             |                |
| Phosphate binder        | 83.3                  | 81.8      | 87.5   | 81.4                   | 83.5                         | 82.4        | 79.4           |
| Calcium acetate         | 40.7                  | 43.7      | 35.1   | 46.9                   | 39.6                         | 42.3        | 40.8           |
| Lanthanum               | 13.0                  | 12.0      | 16.7   | 12.1                   | 12.6                         | 11.8        | 9.9            |
| Sevelamer               | 52.3                  | 47.4      | 61.1   | 44.7                   | 51.7                         | 51.2        | 49.9           |
| Oral vitamin D analogue | 8.6                   | 6.9       | 9.2    | 8.0                    | 8.6                          | 9.5         | 9.0            |
| Calcitriol              | 5.5                   | 4.5       | 5.4    | 5.7                    | 5.6                          | 6.2         | 6.6            |
| Doxercalciferol         | 2.4                   | 1.8       | 2.8    | 2.0                    | 2.4                          | 2.7         | 1.8            |
| Paricalcitol            | 1.2                   | 0.8       | 1.7    | 0.7                    | 1.2                          | 1.2         | 1.0            |
| IV vitamin D analogue   | 79.3                  | 83.6      | 81.1   | 73.9                   | 76.8                         | 79.9        | 68.1           |
| Calcitriol              | 2.4                   | 1.9       | 1.1    | 4.3                    | 1.7                          | 3.4         | 5.3            |
| Doxercalciferol         | 27.4                  | 29.4      | 12.3   | 59.8                   | 25.3                         | 42.0        | 25.7           |
| Paricalcitol            | 59.4                  | 61.3      | 73.9   | 25.3                   | 62.4                         | 50.4        | 45.2           |
| Calcimimetic            |                       |           |        |                        |                              |             |                |
| Cinacalcet              | 31.9                  | 30.6      | 41.3   | 26.4                   | 29.4                         | 28.1        | 24.9           |
| 2008                    |                       |           |        |                        |                              |             |                |
| Phosphate binder        | 83.5                  | 82.3      | 87.5   | 82.2                   | 83.1                         | 82.2        | 80.0           |
| Calcium acetate         | 39.8                  | 43.7      | 32.7   | 48.9                   | 39.2                         | 41.3        | 41.2           |
| Lanthanum               | 12.1                  | 10.3      | 16.0   | 11.1                   | 11.9                         | 10.9        | 10.0           |
| Sevelamer               | 53.4                  | 48.9      | 63.1   | 44.8                   | 51.9                         | 51.7        | 49.8           |
| Oral vitamin D analogue | 9.1                   | 7.8       | 9.6    | 8.4                    | 8.8                          | 10.5        | 9.8            |
| Calcitriol              | 5.8                   | 5.1       | 5.5    | 5.8                    | 5.7                          | 6.8         | 7.2            |
| Doxercalciferol         | 2.3                   | 1.9       | 2.7    | 2.0                    | 2.2                          | 2.7         | 1.9            |
| Paricalcitol            | 1.4                   | 1.1       | 2.0    | 1.0                    | 1.4                          | 1.5         | 1.2            |
| IV vitamin D analogue   | 79.1                  | 83.0      | 80.9   | 78.2                   | 77.1                         | 78.9        | 68.1           |
| Calcitriol              | 1.7                   | 1.0       | 1.1    | 3.9                    | 1.3                          | 2.5         | 3.4            |
| Doxercalciferol         | 22.4                  | 27.0      | 11.2   | 35.2                   | 16.8                         | 30.0        | 24.8           |
| Paricalcitol            | 62.5                  | 62.2      | 73.7   | 64.3                   | 64.2                         | 55.6        | 47.5           |
| Calcimimetic            |                       |           |        |                        |                              |             |                |
| Cinacalcet              | 33.4                  | 30.8      | 44.0   | 27.6                   | 29.5                         | 29.7        | 26.4           |
| 2009                    |                       |           |        |                        |                              |             |                |
| Phosphate binder        | 83.5                  | 82.7      | 86.8   | 83.2                   | 82.5                         | 82.3        | 80.6           |
| Calcium acetate         | 39.3                  | 43.7      | 32.4   | 47.0                   | 38.9                         | 40.3        | 40.6           |
| Lanthanum               | 11.3                  | 9.4       | 14.7   | 10.8                   | 11.3                         | 10.3        | 10.3           |
| Sevelamer               | 53.7                  | 49.4      | 61.7   | 47.8                   | 52.3                         | 52.5        | 50.9           |
| Oral vitamin D analogue | 9.5                   | 7.9       | 10.2   | 9.3                    | 9.4                          | 10.9        | 10.5           |
| Calcitriol              | 6.0                   | 5.2       | 5.7    | 6.2                    | 5.9                          | 6.8         | 7.5            |
| Doxercalciferol         | 2.2                   | 1.7       | 2.8    | 1.9                    | 2.1                          | 2.8         | 1.9            |
| Paricalcitol            | 1.8                   | 1.4       | 2.3    | 1.5                    | 1.9                          | 1.9         | 1.5            |
| IV vitamin D analogue   | 77.5                  | 81.2      | 79.0   | 79.1                   | 76.1                         | 77.9        | 66.0           |
| Calcitriol              | 1.6                   | 0.9       | 1.1    | 3.3                    | 1.3                          | 2.6         | 2.5            |
| Doxercalciferol         | 20.9                  | 26.0      | 11.5   | 10.7                   | 15.3                         | 30.0        | 24.1           |

|                         |      |      |      |      |      |      |      |
|-------------------------|------|------|------|------|------|------|------|
| Paricalcitol            | 62.4 | 62.4 | 71.6 | 71.8 | 66.5 | 55.9 | 45.6 |
| Calcimimetic            |      |      |      |      |      |      |      |
| Cinacalcet              | 32.0 | 29.6 | 39.9 | 28.9 | 28.8 | 29.3 | 27.8 |
| 2010                    |      |      |      |      |      |      |      |
| Phosphate binder        | 82.9 | 82.0 | 86.0 | 83.4 | 82.2 | 82.1 | 79.5 |
| Calcium acetate         | 38.8 | 42.5 | 33.4 | 45.8 | 39.8 | 38.3 | 39.6 |
| Lanthanum               | 9.5  | 7.9  | 12.7 | 8.4  | 9.3  | 8.7  | 8.1  |
| Sevelamer               | 54.4 | 50.7 | 60.7 | 50.8 | 52.6 | 54.9 | 51.6 |
| Oral vitamin D analogue | 10.0 | 8.3  | 10.5 | 9.5  | 9.7  | 12.6 | 10.4 |
| Calcitriol              | 6.3  | 5.5  | 6.0  | 6.3  | 5.8  | 8.3  | 7.6  |
| Doxercalciferol         | 2.2  | 1.5  | 2.8  | 2.0  | 2.1  | 2.9  | 1.8  |
| Paricalcitol            | 2.0  | 1.6  | 2.5  | 1.6  | 2.2  | 2.5  | 1.5  |
| IV vitamin D analogue   | 77.5 | 81.6 | 78.8 | 79.2 | 75.6 | 78.0 | 65.5 |
| Calcitriol              | 1.8  | 1.1  | 1.4  | 2.6  | 1.3  | 2.9  | 3.3  |
| Doxercalciferol         | 35.4 | 23.6 | 55.3 | 61.1 | 23.7 | 31.4 | 29.1 |
| Paricalcitol            | 65.0 | 74.8 | 68.8 | 65.2 | 66.4 | 54.6 | 41.6 |
| Calcimimetic            |      |      |      |      |      |      |      |
| Cinacalcet              | 31.1 | 29.1 | 36.9 | 29.1 | 27.6 | 30.8 | 27.3 |

IV, intravenous.
