# Supplementary material
Source: PubMed Central journal article supplement (PMC4209315)
Supplement: NIHMS598882-supplement-07.pdf [file NIHMS598882-supplement-07.pdf]

**Table S5.** Percentage of Part D enrolled dialysis patients using both intravenous doxercalciferol and paricalcitol in each year

| Year | Dialysis Organization |           |        |                        |                              |             |                |
|------|-----------------------|-----------|--------|------------------------|------------------------------|-------------|----------------|
|      | All                   | Fresenius | DaVita | Dialysis Clinics, Inc. | Small Dialysis Organizations | Independent | Hospital-Based |
| 2007 | 8.7                   | 7.9       | 5.6    | 13.5                   | 11.6                         | 14.0        | 5.9            |
| 2008 | 6.5                   | 6.5       | 4.4    | 23.1                   | 4.5                          | 8.0         | 5.6            |
| 2009 | 6.6                   | 7.6       | 4.6    | 5.1                    | 6.3                          | 9.4         | 5.2            |
| 2010 | 23.8                  | 17.4      | 45.9   | 48.4                   | 15.3                         | 10.0        | 6.9            |
